# Supplementary material for: Health literacy education programmes developed for qualified health professionals: a scoping review
Source: HighWire-hosted journal article supplement (doi:10.1136/bmjopen-2022-070734), 2023-03-01
Supplement: bmjopen-2022-070734supp002_data_supplement.pdf [file bmjopen-2022-070734supp002_data_supplement.pdf]

| Search Strategy |                                                                                                                                                                                                                                        |
|-----------------|----------------------------------------------------------------------------------------------------------------------------------------------------------------------------------------------------------------------------------------|
| 1               | (("healthcare" or "health care") adj2 (professional* or provider* or personnel or worker*)).tw. or health personnel/                                                                                                                   |
| 2               | exp education/                                                                                                                                                                                                                         |
| 3               | (education adj2 (continuing or "competency based" or "competency-based" or health or program or programme*)).tw.                                                                                                                       |
| 4               | (workshop* or (problem-based adj (curricul* or learning))).tw. or ("problem based" adj2 (curricul* or learning)).mp. or (learning adj2 (active or experiential or problem-based or "problem based or case-based" or "case based")).tw. |
| 5               | (training adj2 (course* or module* or program or programme*)).tw.                                                                                                                                                                      |
| 6               | training.tw. or inservice training/ or intervention*.tw. or course*.tw. or module*.tw.                                                                                                                                                 |
| 7               | staff development/ or clinical competence/ or program evaluation/ or program development/ or continu* professional development.tw.                                                                                                     |
| 8               | 2 or 3 or 4 or 5 or 6 or 7                                                                                                                                                                                                             |
| 9               | exp Health Literacy/ or "health literacy".mp. or exp "health promotion"/ or "health literacy education".tw.                                                                                                                            |
| 10              | ("health literacy" or ("health literacy" adj2 (competenc* or skill* or knowledge or attitudes))).tw.                                                                                                                                   |
| 11              | communication skill*.tw.                                                                                                                                                                                                               |
| 12              | (communication* adj2 ("teach back" or "teach-back" or method* or personal or program or social or personnel or health or nonverbal or non-verbal)).tw.                                                                                 |
| 13              | (skill* adj2 (interpersonal or social)).tw.                                                                                                                                                                                            |
| 14              | 9 or 10 or 11 or 12 or 13                                                                                                                                                                                                              |
| 15              | 1 and 8 and 14                                                                                                                                                                                                                         |
| 16              | limit 15 to (english language and yr="1973 – 2021")                                                                                                                                                                                    |
